# Supplementary material for: Association between Exposure to Ambient Air Pollution and Age-Related Cataract: A Nationwide Population-Based Retrospective Cohort Study
Source: MDPI journal article supplement (doi:10.3390/ijerph17249231), 2020-12-10
Supplement: s1 [file s1]

**Supplementary Table S1.** The air pollutants and meteorological data in Korea from 2002 – 2015

| Variables                 | Mean | SD   | IQR | Percentiles |      |      |      |         |
|---------------------------|------|------|-----|-------------|------|------|------|---------|
|                           |      |      |     | Minimum     | 25th | 50th | 75th | Maximum |
| Air pollution             |      |      |     |             |      |      |      |         |
| PM <sub>2.5</sub> , µg/m³ | 23.1 | 4.4  | 7.0 | 16.0        | 20.3 | 22.0 | 27.3 | 30.0    |
| PM <sub>10</sub> , µg/m³  | 53.0 | 4.9  | 9.1 | 44.8        | 48.5 | 52.4 | 57.6 | 61.0    |
| CO, 10 ppm                | 5.9  | 0.7  | 1.1 | 5.2         | 5.3  | 5.6  | 6.4  | 7.0     |
| SO <sub>2</sub> , ppb     | 5.7  | 0.5  | 0.7 | 4.7         | 5.3  | 5.7  | 6.0  | 6.4     |
| NO <sub>2</sub> , ppb     | 25.3 | 1.9  | 2.1 | 23.0        | 24.0 | 25.0 | 26.1 | 29.1    |
| O <sub>3</sub> , ppb      | 24.9 | 4.1  | 5.4 | 17.1        | 21.8 | 24.4 | 27.1 | 38.0    |
| Annual weather conditions |      |      |     |             |      |      |      |         |
| Average temperature, °C   | 12.8 | 0.6  | 1.1 | 12.0        | 12.2 | 12.9 | 13.3 | 13.6    |
| Total rainfall, mm        | 1486 | 395  | 444 | 792         | 1320 | 1451 | 1764 | 2044    |
| Average wind speed, m/s   | 2.48 | 0.24 | 0.3 | 2.0         | 2.4  | 2.45 | 2.7  | 2.8     |

Particulate matter <10 µm (PM<sub>10</sub>), Sulfur dioxide (SO<sub>2</sub>), Nitrogen dioxide (NO<sub>2</sub>), Carbon monoxide (CO) and Ozone (O<sub>3</sub>) were measured between 2002 – 2015.  
Particulate matter < 2.5 µm (PM<sub>2.5</sub>) was measured in 2015.

Temperature, rainfall and wind speed were shown at Seoul (Lat.(N) 37°34', Long.(E) 126°57'). Korea Meteorological Administration, Seoul, Korea
